1 **Unbiased classification of mosquito blood cells by single-cell genomics and high-content**  
2 **imaging**

3

4 Maiara S. Severo<sup>1</sup>, Jonathan J.M. Landry<sup>2</sup>, Randall L. Lindquist<sup>3</sup>, Christian Goosmann<sup>4</sup>, Volker  
5 Brinkmann<sup>4</sup>, Paul Collier<sup>2</sup>, Anja E. Hauser<sup>3,5</sup>, Vladimir Benes<sup>2</sup>, Johan Henriksson<sup>6</sup>, Sarah A.  
6 Teichmann<sup>6</sup>, Elena A. Levashina<sup>1,7\*</sup>

7

8 <sup>1</sup>Vector Biology Unit, Max-Planck-Institute for Infection Biology, Charitéplatz 1, 10117 Berlin,  
9 Germany

10 <sup>2</sup>Genomics Core Facility, European Molecular Biology Laboratories, Meyerhofstraße 1, 69117  
11 Heidelberg, Germany

12 <sup>3</sup>Deutsches Rheumaforschungszentrum, Charitéplatz 1, 10117 Berlin, Germany

13 <sup>4</sup>Microscopy Core Facility, Max-Planck-Institute for Infection Biology, Charitéplatz 1, 10117 Berlin,  
14 Germany

15 <sup>5</sup>Immune Dynamics and Intravital Microscopy, Charité Universitätsmedizin, Charitéplatz 1, 10117  
16 Berlin, Germany

17 <sup>6</sup>Wellcome Trust Sanger Institute and European Bioinformatics Institute, Wellcome Genome  
18 Campus, Hinxton, Cambridge, CB10 1SD, UK

19 <sup>7</sup>Lead contact

20

21 \*Correspondence: [levashina@mpiib-berlin.mpg.de](mailto:levashina@mpiib-berlin.mpg.de)

22

23

24

## 25 **ABSTRACT**

26 Mosquito blood cells are ancestral immune cells that help control infection by vector-borne  
27 pathogens. Despite their importance, little is known about mosquito blood cell biology beyond the  
28 ambiguous morphological and functional criteria used for their classification. Here we combined  
29 the power of single-cell RNA-sequencing, imaging flow cytometry and single-molecule RNA  
30 hybridization to analyze blood cells of the malaria mosquito *Anopheles gambiae*. By  
31 demonstrating that blood cells express nearly half of the mosquito transcriptome, our dataset  
32 represents an unprecedented view into their transcriptional machinery. Analyses of differentially  
33 expressed genes identified transcriptional signatures of two distinct cell types that challenge the  
34 current morphology-based classification of these cells. We further demonstrated an active transfer  
35 of a cellular marker between blood cells that confounds their identity. We propose that cell-to-cell  
36 exchange is broadly relevant for cell type classification and may account for the remarkable  
37 cellular diversity observed in nature.

38

## 39 **INTRODUCTION**

40 The cell is the basic building block of all living organisms. All the major decisions coordinating  
41 systems at the organismal level, be it life or death, health or disease, start within a cell. In  
42 eukaryotes, multicellularity came with cell compartmentalization and specialization. Cells found in  
43 the blood, or hemolymph in invertebrates, have received numerous denominations, such as  
44 hemocytes, amebocytes, phagocytes, coelomocytes and immunocytes (Ottaviani and  
45 Franceschi, 1997). Regardless of their names, these cells play key roles in shaping the  
46 extracellular environment and helping fight infection all throughout the animal kingdom. In insects,  
47 blood cells are found circulating by the flow of hemolymph, or as sessile cells associated with  
48 internal organs (Ribeiro and Brehelin, 2006). These cells are considered the equivalent of  
49 leukocytes in mammals, and display extraordinary functional resemblances to neutrophils,  
50 monocytes and macrophages, e.g. phagocytic abilities, chemotaxis, production of antimicrobial  
51 peptides, free radicals and cytokine-like molecules (Bergin et al., 2005; Browne et al., 2013;  
52 Buchmann, 2014; Costa et al., 2005; Lavine and Strand, 2002). Contrary to the well-established  
53 classification of human leukocytes, blood cell type classification is controversial in insects, with

54 similar terms being used for different cell morphologies even within the same insect order  
55 (Brayner et al., 2005; Castillo et al., 2006; Hernandez et al., 1999; Ribeiro and Brehelin, 2006).  
56 Of note, most studies of insect blood cells have focused on the embryonic and larval stages of  
57 the *Drosophila* model (Brandt et al., 2008; Vlisidou and Wood, 2015; Wood and Jacinto, 2007)  
58 and these observations are not immediately applicable to other insects (Ribeiro and Brehelin,  
59 2006; Zdobnov et al., 2002), particularly in the study of the adult life stages of insects implicated  
60 in disease transmission to humans.

61 Mosquitoes are the deadliest animals on Earth, transmitting pathogens that cause a variety of  
62 diseases and infect millions of people worldwide every year (WHO, 2014). While feeding on blood  
63 to reproduce, adult female mosquitoes acquire blood-borne pathogens from an infected host.  
64 Pathogen development and replication within the mosquito is an absolute requirement for further  
65 transmission, so the disease cycle is, in part, determined by the mosquitoes' capacity to  
66 counterattack these pathogens. Mosquito blood cells are of vital importance in this process as  
67 they represent the cellular arm of mosquito immunity, and also participate in humoral responses  
68 by secreting pathogen-killing factors, such as components of the melanization pathway (Hillyer et  
69 al., 2003; Yassine et al., 2012) and of the complement-like system that help eliminate malaria  
70 parasites (Blandin et al., 2004; Frolet et al., 2006). Earlier transcriptomics studies based on  
71 microarrays have explored the molecular basis of mosquito hemocyte immunity upon infection  
72 with bacteria and *Plasmodium* (Baton et al., 2009; Pinto et al., 2009). More recently, Smith et al  
73 used mass spectrometry to analyze mosquito hemocytes isolated based on their uptake of  
74 magnetic beads (Smith et al., 2016). To identify genes and proteins more predominantly  
75 expressed in hemocytes or in 'phagocytes', these studies relied on enrichment analyses of blood  
76 cells relative to whole body or total hemolymph samples, respectively. This restricted the  
77 identification of genes co-expressed in blood cells and other tissues, and masked the contribution  
78 of sessile hemocytes to overall systemic responses. Such approaches are standard in the study  
79 of hemocyte biology, mainly due to the practical constraints associated with the scarcity of these  
80 cells and the lack of cellular markers for successful hemocyte isolation and purification.

81 Importantly, the absence of cellular markers has also precluded the classification of mosquito  
82 blood cells beyond morphology and function. To date, mosquito hemocytes are morphologically  
83 divided based on label-free light microscopy into: (1) granulocytes, phagocytic cells that exhibit  
84 granules in their cytoplasm and quickly spread onto glass; (2) oenocytoids, spherical and poorly  
85 adhesive cells that produce phenoloxidases involved in melanization defenses; and (3)  
86 prohemocytes, small cells of reportedly 2  $\mu\text{m}$  (Rodrigues et al., 2010; Smith et al., 2015) or 4-6

87  $\mu\text{m}$  in size that have been suggested to function as hemocyte progenitors (Castillo et al., 2006),  
88 and/or represent small phagocytic cells arising from asymmetrical divisions (King and Hillyer,  
89 2013). Although it has been demonstrated that mosquito hemocytes increase in numbers upon  
90 blood feeding and infection, in the absence of known hematopoietic organs (Bryant and Michel,  
91 2014; King and Hillyer, 2013), the pathways underlining their differentiation into these three  
92 classes remain unknown. Whether the current classification represents true discrete cell types or  
93 states, and if mosquito blood cell subpopulations exist, are also yet to be explored. In humans  
94 and mice, single-cell transcriptomics have recently began to tackle similar questions. It is now  
95 also increasingly evident that significant functional differences and considerable variability in gene  
96 expression can be recognized in cells long considered to be of the same type (Gaublomme et al.,  
97 2015; Grun et al., 2015; Shalek et al., 2014). The use of single-cell approaches to explore cellular  
98 heterogeneity in non-model organisms holds the promise to uncover unforeseen complexity, and  
99 identify cellular populations that would be forever 'masked' in bulk, enrichment-based  
100 measurements. In addition, single-cell studies of invertebrates can contribute to comparative  
101 analyses of cellular diversity across different systems.

102 Here we unravel the molecular fingerprint of a subset of mosquito blood cells at a single-cell level,  
103 and show that naïve, unstimulated hemocytes express nearly half of the mosquito transcriptome.  
104 Our dataset represents a valuable resource for further studies of transcriptional regulation in  
105 mosquitoes, and paves the way for the identification of new molecules controlling infection by  
106 vector-borne pathogens. By applying fluorescence-activated cell sorting (FACS), single-cell RNA-  
107 sequencing (scRNA-seq) and high-content imaging flow cytometry to the analysis of mosquito  
108 hemocytes, our unparalleled study identifies two distinct blood cell subpopulations, which we  
109 propose to call plasmatocytes and melanocytes. Remarkably, the identified cell subsets do not  
110 directly correspond to the current morphological and functional classification of mosquito blood  
111 cells, and indicate that the emerging observations of cellular heterogeneity in humans and mice  
112 are also characteristic of ancestral blood cells. Our findings further reveal active molecular  
113 exchange between mosquito blood cells and the presence of extracellular vesicles (EVs) in the  
114 mosquito hemolymph. Shuffling of mRNA and proteins between distinct cell types can influence  
115 cellular identity and, in turn, confound cell type identification and classification. Altogether, we  
116 demonstrate the power of single-cell technologies in shedding light on the contribution of cell-to-  
117 cell exchange to cellular diversity and provide a new perspective on the discussion of the slippery  
118 concept of 'cell types'.

119

120

## 121 RESULTS

### 122 Single-cell RNA-sequencing of blood cells from *PPO6::RFP* transgenic mosquitoes

123 In the absence of hemocyte-specific antibodies and dyes, or of transgenic mosquitoes expressing  
124 pan-hemocyte markers, we chose to explore a subset of blood cells identified in a transgenic  
125 mosquito strain expressing a red fluorescence reporter (tdTomato, abbreviated herein as RFP)  
126 under the control of the *prophenoloxidase 6* (*PPO6*) melanization-related gene (*PPO6::RFP*)  
127 (Vолоhonsky et al., 2015). Melanization is a well-established immune response of invertebrates  
128 that controls infection against bacteria and parasites (Abraham et al., 2005; Christensen et al.,  
129 2005; Hillyer and Strand, 2014; Michel et al., 2005). Several reports suggest that melanization is  
130 mediated by a specific cell population called oenocytoids, which represents approximately 10%  
131 of the blood cells (Castillo et al., 2006; Hillyer and Strand, 2014), but these cells have not been  
132 directly explored. Our focus was on cells obtained in the absence of infection or blood feeding,  
133 i.e. during homeostasis because it provides a baseline for analysis of cell-to-cell variation. Using  
134 this transgenic strain, we first investigated whether RFP-positive hemocytes were present in the  
135 mosquito circulation. For that, we perfused hemolymph onto microscope slides and identified cells  
136 displaying RFP fluorescence within the size range predictive of hemocytes (Figure 1A). RFP  
137 signal was also observed in hemocytes attached to the inner abdominal wall of dissected adult  
138 female mosquitoes, where fat body cells are most prominent (Figure 1B, arrow). As expected, the  
139 hemolymph perfusate was, however, heavily contaminated with a mixture of cells and  
140 subcellular/tissue debris (Castillo et al., 2006). To purify live RFP-positive cells, we developed a  
141 FACS approach based on RFP expression and Hoechst nuclear staining, and validated our  
142 purification method by microscopic inspection of sorted cells (Figure 1C-D). Notably, the sorted  
143 cell population corresponded to 0.1% of the total events measured (n=100,000) in the perfusate  
144 of at least 10 mosquitoes (see Methods). This is in accordance with previous work indicating that  
145 only a small subset of adult mosquito hemocytes produce PPOs (Hillyer and Strand, 2014).

146 Next, we FACS-sorted single blood cells and performed scRNA-seq to capture the transcriptome  
147 of single PPO-producing blood cells (Figure 1E). Hemocytes were sorted into a 96-well plate and  
148 after sample processing and quality assessment (see Methods), we obtained successful cDNA  
149 amplification for 56 single-cells in addition to two pools of 30 cells each, from which 28 high quality  
150 cDNA libraries were sequenced, representing 26 single hemocytes and the two pooled samples

151 (Figure S1A-D). As a single mosquito can contain as little as 500 blood cells in the circulation  
152 (Bryant and Michel, 2014; Hillyer, 2010), we believe the small number of cells analyzed reflects a  
153 combination of technical limitations inherent to our approach. First, blood cell isolation is not trivial  
154 in mosquitoes, as it requires hemolymph perfusion under micromanipulation followed by cell  
155 purification, posing great difficulty in obtaining high numbers of live cells. Second, mosquito blood  
156 cells reportedly vary in size from as little as 2 to 20  $\mu\text{m}$  (Brayner et al., 2005; Bryant and Michel,  
157 2016; Castillo et al., 2006; Hernandez et al., 1999), and variability in cell size can significantly  
158 affect RNA recovery, as small cells contain small amounts of RNA. The adaptation of the scRNA-  
159 seq protocol to the study of an invertebrate system, e.g. the choice of lysis buffer and chemistry,  
160 may also have influenced our results, especially since different biological cell types show distinct  
161 technical quality features in scRNA-seq experiments (Illicic et al., 2016). A small number of cells  
162 has, nevertheless, been used in other scRNA-seq studies (Shalek et al., 2013; Xue et al., 2013)  
163 and does not preclude identification of cellular types when an adequate sequencing depth is used.  
164 We, therefore, prioritized the deep sequencing of individually curated, very high-quality samples  
165 representing a small subset of cells obtained *ex vivo*.

166 Indeed, our sequencing generated on average 4.5 million reads per sample, well-above the  
167 minimum of one million reads previously suggested as a requirement for adequate single-cell  
168 studies (Wu et al., 2014). Over 70% of the reads were successfully mapped, with exonic reads  
169 comprising of more than 40% (Figure S1E-F and Table S1). All samples achieved saturation at  
170 around 2 million reads, comparable to previously observed for mammalian cells (Wu et al., 2014).  
171 For further analyses, we discarded one cell as it showed gene expression suggestive of a doublet  
172 (Figure S1F). Doublets have been reported in the circulation of adult female mosquitoes (King  
173 and Hillyer, 2013) and may fall within a size range comparable to larger hemocytes. Around 3,800  
174 genes were detected in each pool, whereas single-cells expressed between 450 and 1,400 genes.  
175 Similar expression profiles were obtained for pools and single-cells (Figure 1F) with comparable  
176 numbers of detected genes only in single-cells or in the pools (1,100 and 1,200 genes,  
177 respectively) (Figure 1G). The marker genes used for FACS-sorting (*PPO6* and *tdTomato*) were  
178 identified in both single-cells and pools (Table S2), confirming the efficiency of our method.  
179 Altogether, our results show that the transcriptome of mosquito hemocytes comprises of over  
180 6,000 genes, of which more than half (3,400) had not been identified in earlier studies (Figure  
181 S1G) (Baton et al., 2009; Pinto et al., 2009). In addition, our approach revealed sequences for  
182 over 80% (n=914) of the proteins reported by an earlier proteomics approach based on magnetic

183 beads isolation of *A. gambiae* phagocytes (Smith et al., 2016) (Figure S1H), corroborating our  
184 findings and demonstrating the higher sensitivity of RNA sequencing as compared to proteomics.

185 Mosquito hemocyte biology has been mostly studied in the context of immunity. We, thus,  
186 inspected our dataset for previously identified immune genes. Several members of immune  
187 pathways were expressed at low levels in some naïve hemocytes, such as the transcription  
188 factors *REL1* (AGAP009515) and *REL2* (AGAP006747), *Cactus* (AGAP007938),  
189 *IκBβ* (AGAP009166) and *IκBγ* (AGAP005933), and the receptors *PGRP-LC* (AGAP005203) and  
190 *PGRP-S1* (AGAP000536) (Table S2). Components of the complement cascade, e.g. *TEP1*  
191 (AGAP010815), *APL1C* (AGAP007033), *LRIM1* (AGAP006348) and *HPX2* (AGAP009033), were  
192 also detected in some cells, along with the LPS-induced TNFα transcription factor (LITAF)-like 3  
193 (AGAP009053) described to control *Plasmodium* survival in the gut (Smith et al., 2015). The  
194 phagocytic and antibacterial activities of these cells can be illustrated by the expression of *Eater*  
195 (AGAP012386), *Ninjurin* (AGAP006745) and *Nimrod* (AGAP009762), alongside that of several  
196 fibrinogen-related proteins (FREPs/FBNs), such as *FBN8* (AGAP011223), *FBN9* (AGAP011197),  
197 *FBN10* (AGAP011230) and *FBN30* (AGAP006914) (Dong and Dimopoulos, 2009; Estevez-Lao  
198 and Hillyer, 2014; Lombardo et al., 2013). Although no ortholog for a major *Drosophila* hemocyte  
199 marker, hemolectin, has been described in the *A. gambiae* genome, mosquito hemocytes  
200 expressed both *Pannier* (AGAP002235) and *Serpent* (AGAP002238) GATA factors, as well as  
201 *misshapen* (AGAP006340), which are associated with blood cell differentiation, maturation and  
202 activation in fruit fly larvae (Braun et al., 1997; Fossett et al., 2003; Minakhina et al., 2011). Genes  
203 involved in cell adhesion and polarity, such as *integrin β-1* (AGAP010233), *laminin*  
204 (AGAP010548), *Notch1* (AGAP001015) and *Armadillo* (AGAP001043), and components of  
205 extracellular matrix like *collagen type IV* (AGAP009200) were also identified. The processed gene  
206 expression data for visualization in single cells is accessible at <http://data.teichlab.org>. Our  
207 transcriptional data suggests that in addition to immunity, naïve blood cells are performing tissue  
208 maintenance and morphogenesis tasks.

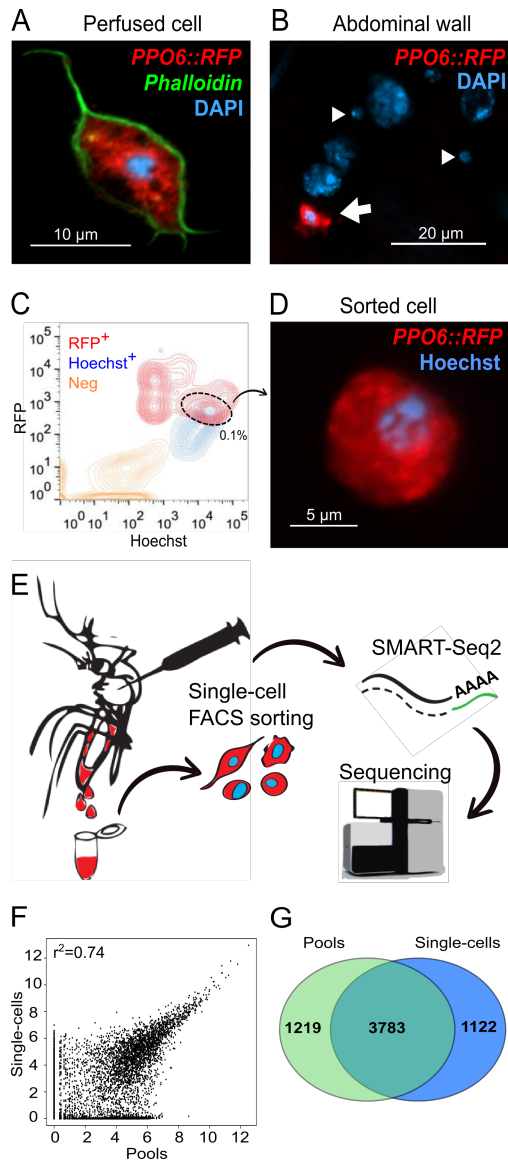

209

210 **Figure 1: Single-cell RNA-sequencing of transgenic mosquitoes expressing a RFP**  
211 **reporter.** A *PPO6::RFP* transgenic mosquito strain was used for isolation of blood cells. (A) A  
212 RFP-expressing hemocyte (red) obtained by perfusion of a female adult mosquito. (B) Only a  
213 proportion of adult mosquito blood cells display RFP expression (red, arrow), whereas other cells  
214 of sizes suggestive of hemocytes do not (arrowhead). (C) FACS sorting of RFP<sup>+</sup> (R<sup>+</sup>) Hoechst<sup>+</sup>  
215 (H<sup>+</sup>) blood cells from hemolymph of perfused *PPO6::RFP* mosquito females. (D) Representative  
216 image of a sorted cell. (E) The pipeline developed for the study of mosquito blood cells based on  
217 single-cell RNA-sequencing. Cells were sorted into a 96-well plate, processed according to the  
218 SMART-Seq2 protocol and sequenced in a HiSeq Illumina platform. (F) Scatter plot for the  
219 average normalized read counts from pools and single-cells.  $r^2$  indicates Pearson correlation. (G)



220 Venn diagram of genes detected in single-cells and pools (normalized count  $\geq 1$ ). Scale bars: (A)  
221 10  $\mu\text{m}$ , (B) 20  $\mu\text{m}$ , (D) 5  $\mu\text{m}$ . DNA is stained with DAPI (A-B) and Hoechst (D).

222

## 223 **Identification of blood cell subpopulations**

224 To account for the technical noise arising from the small amounts of RNA, we included in our  
225 samples External RNA Controls Consortium spike-ins (ERCC) prior to cDNA amplification (Baker  
226 et al., 2005). We analyzed percentage of spike-ins and mitochondrial counts as a proxy for  
227 sequencing efficiency, RNA degradation or incomplete lysis and potential cell death. As  
228 anticipated, variation was observed (Figure S1I-J), but caution was taken in applying these criteria  
229 and attributing them biological meaning because variability could have arisen from true cell type-  
230 related processes. Differences in total number of expressed genes could also have stemmed from  
231 different morphologies and cell types. Therefore, we decided not to further discard any cells, and  
232 manually curated their individual mappings to confirm that the samples corresponded to  
233 potentially true representations of mosquito blood cells. To estimate technical noise, we applied  
234 the variability threshold based on the square of the coefficient of variation ( $CV^2$ ) of the spike-ins  
235 (Brennecke et al., 2013), and identified 148 genes whose expression exceeded the variability  
236 threshold modeled by the spike-ins (Figure 2A). These highly variable genes included a  
237 scavenger receptor, fibrinogen-related and leucine-rich repeat-containing proteins, as well as  
238 genes involved in vesicle transport, metabolism and transcription (Table S3). No genes directly  
239 associated with cell cycle had high variability, although several *cyclin* genes were detected in  
240 specific cells (Table S2), corroborating previous reports of the potential of mosquito hemocytes  
241 to undergo cellular division (Bryant and Michel, 2014, 2016; King and Hillyer, 2013).

242 Considering the variable genes, we carried out hierarchical clustering based on pairwise Pearson  
243 correlation, which suggested the presence of at least two groups of mosquito blood cells in our  
244 samples (Figure 2B). Principal component analysis (PCA) also yielded two cell populations,  
245 supporting our clustering results (Figure 2C). Interestingly, the expression levels of *PPO6* showed  
246 high variability, and the overlay of *PPO6* expression onto the PCA plot suggested that the two  
247 clusters were largely characterized by low and high expression of *PPO6*. Differences in the *PPO6*  
248 expression levels have been previously described by immunofluorescence microscopy (Bryant  
249 and Michel, 2016) but have not been associated with cell types. Moreover, from the ten *PPO*  
250 genes encoded in the *A. gambiae* genome, eight were observed in our sequencing and six of

251 them, as well as the *RFP* reporter, had variable expression between individual cells and the  
252 groups (Figure 2D and Table S3). Hence, we designated these two groups as  $PPO6^{high}$  and  
253  $PPO6^{low}$ .

254

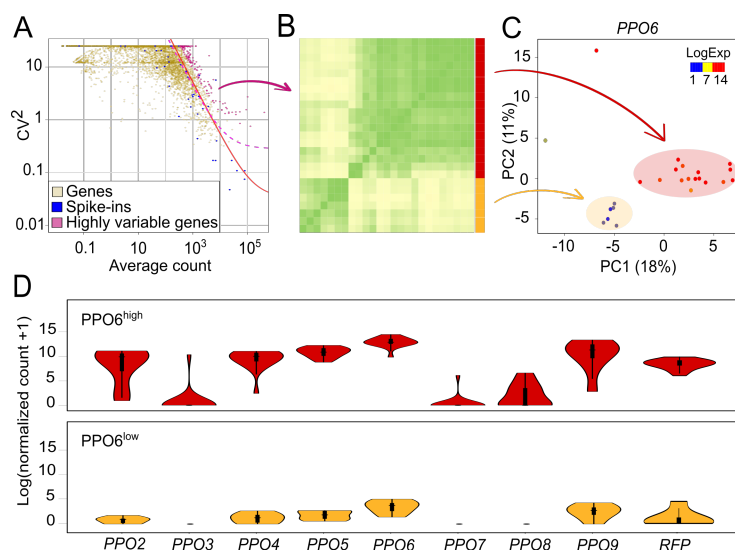

255

256 **Figure 2: Identification of mosquito blood cell subpopulations.** (A) The expression variability  
257 of individual genes measured by the squared coefficient of variation ( $CV^2$ ) is plotted against the  
258 mean expression level (normalized counts). Magenta points indicate mosquito genes showing  
259 higher than expected expression variability compared with ERCC spike-ins (blue) (adjusted  $p$   
260 value  $<0.1$ ). The red line is the fitted line of the spike-ins and the dashed line (pink) marks the  
261 margin for genes with 50% biological CV. (B) Pearson correlation heatmap of single hemocytes  
262 based on the expression of the highly variable genes identified in (A). Correlation suggests the  
263 presence of two groups of cells (red and yellow). (C) PCA plot based on the expression of highly  
264 variable genes. The first two principal components are shown, and each point represents one  
265 single hemocyte. Two clusters were identified and correspond to the subgroups in (B). *PPO6*  
266 expression, as  $\text{log}_{10}$  (normalized counts + 1), is overlaid onto the PCA plot. (D) Violin plots of  
267 *PPOs* and *RFP* expression in the identified groups.

268

269

270

## 271 **PPO6<sup>high</sup> and PPO6<sup>low</sup> cells represent transcriptionally distinct subpopulations**

272 Among the highly variable genes, we detected several *FBN* sequences, such as *FBN8*, *10* and  
273 *30*. PPO6<sup>high</sup> cells showed high expression levels of *FBN10* (Figure 3A, left panel), whereas  
274 PPO6<sup>low</sup> cells exhibited weak or lack expression of *FBN8*, *10* and *30* (Figure 3A, Table S3).  
275 Although below the ERCC-defined variability threshold, likely due to the small number of cells  
276 analyzed, expression of the antimicrobial peptide gene *lysozyme type I (LysI)* (AGAP011119) was  
277 more characteristic of PPO6<sup>low</sup> cells (Figure 3A, middle panel). In the search for a pan-hemocyte  
278 marker, we also identified expression of phagocytic receptor *Nimrod* in both groups of cells  
279 (Figure 3A, right panel). To validate the *in silico* data, we performed single-molecule RNA  
280 fluorescence *in situ* hybridization (RNA-FISH), and observed co-expression of *tdTomato* and  
281 *PPO6* in all *PPO6::RFP* hemocytes, with no detection of *tdTomato* in blood cells isolated from  
282 wild-type mosquitoes (Figure S2A-B, and data not shown). In terms of *PPO6* levels, RNA-FISH  
283 accurately distinguished PPO6<sup>high</sup> and PPO6<sup>low</sup> hemocytes, confirming our bioinformatics results.  
284 Consistently, PPO6<sup>high</sup> cells showed high levels of *FBN10*, which were very low or absent in  
285 PPO6<sup>low</sup> cells. High levels of *LysI* were found in PPO6<sup>low</sup> cells, reinforcing the presence of  
286 PPO6<sup>low</sup>/*FBN10*<sup>low</sup>/*LysI*<sup>high</sup> cells; and *Nimrod* was near ubiquitously expressed in all perfused  
287 hemocytes (Figure 3B). We took advantage of the high conservation levels of *PPO6*, *LysI* and  
288 *Nimrod* in the closely related mosquito species, *Anopheles stephensi*, the Asian malaria vector,  
289 to explore whether the newly discovered blood cell subgroups were present in other anopheline  
290 mosquitoes. Indeed, PPO6<sup>high</sup> and PPO6<sup>low</sup>/*LysI*<sup>high</sup> cells were seen, along with a low degree of  
291 expression of *Nimrod*. No *FBN10* was measured (Figure S2C), probably due to the specificity of  
292 the probe to *A. gambiae* and the large diversity of this gene family.

293 To obtain the transcriptional signatures of PPO6<sup>high</sup> and PPO6<sup>low</sup> cells, we compared the overall  
294 gene expression between these two groups. Based on differentially expressed genes, gene  
295 ontology (GO) analyses uncovered that melanization characterized PPO6<sup>high</sup> cells, whereas  
296 metabolism and RNA processing defined the PPO6<sup>low</sup> subset (Table S4). Although not significant,  
297 PPO6<sup>low</sup> cells appeared to express more genes in total, but mitochondrial counts did not differ  
298 between the groups (Figure S2D). These findings suggest that PPO6<sup>high</sup> cells are specialized for  
299 melanization responses, expressing genes involved in these processes at very high levels,  
300 whereas PPO6<sup>low</sup> cells execute a broader range of biological tasks, including melanization. An  
301 alternative explanation would be that these groups represent different cell lineages, or perform  
302 melanization for diverse processes, e.g. metamorphosis and cuticle sclerotization, as established  
303 in other insects (Dudzic et al., 2015; Tsao et al., 2015; Tsao et al., 2009). Transcriptional

304 differences between the two groups could also reflect localization patterns of the cells inside the  
305 mosquito body, as blood cells can be found in the circulation or attached to internal organs (King  
306 and Hillyer, 2013) and sessile cells could have been displaced during hemolymph perfusion. To  
307 assess whether observed differences were related to tissue residency, we performed RNA-FISH  
308 in tissues. The analyses of sessile cells revealed both cell populations in close contact with fat  
309 body cells within the abdominal wall with no conspicuous cell clusters. The majority of the sessile  
310 cells were positive for *Nimrod*, independent of their *PPO* expression (Figure 3C), indicating that  
311 *Nimrod* is a potential marker for both circulating and tissue-resident blood cells. Altogether, these  
312 results demonstrate that both circulatory and tissue-resident hemocytes display transcriptional  
313 heterogeneity, and that PPO6<sup>high</sup> and PPO6<sup>low</sup> cell populations are present in two mosquito  
314 species.

315

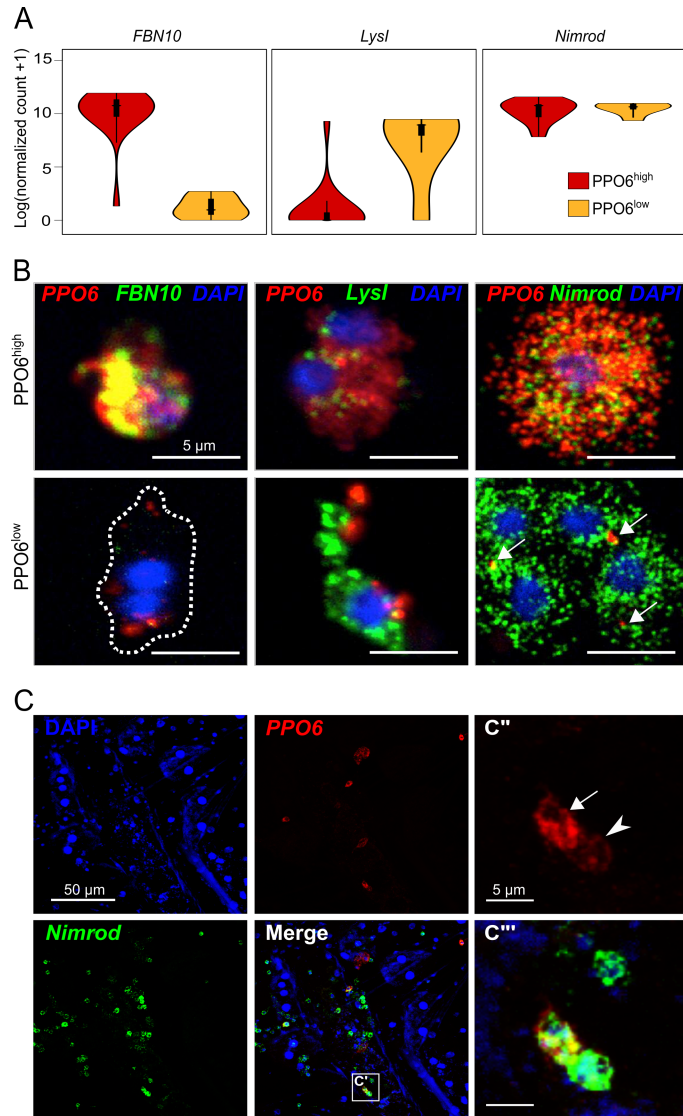

316

317 **Figure 3: Characterization of PPO6<sup>high</sup> and PPO6<sup>low</sup> cell subpopulations.** (A) Violin plots of  
318 the expression of putative population and pan-hemocyte markers. (B) RNA-FISH validation of  
319 identified PPO6<sup>high</sup> and PPO6<sup>low</sup> cell subpopulations in perfused cells based on markers shown in  
320 (A). Cells were classified as PPO6<sup>high</sup> (upper panel) or PPO6<sup>low</sup> (lower panel) according to the  
321 expression of *PPO6* (red). Arrows indicate lower *PPO6* signal. (C-C''') PPO6<sup>high</sup> and PPO6<sup>low</sup> cell  
322 subpopulations can also be seen as tissue-resident blood cells attached to the inner abdominal  
323 wall of female mosquitoes. Arrow and arrowhead indicate PPO6<sup>high</sup> and PPO6<sup>low</sup> cell  
324 subpopulations, respectively. Scale bars: (B) 5 μm, (C) 50 μm, (C''-C''') 5 μm. DNA is stained with  
325 DAPI.

326

## 327 **PPO6<sup>high</sup> and PPO6<sup>low</sup> cells share functional and morphological features**

328 Mosquito blood cells are functionally and morphologically separated into three classes -  
329 granulocytes, oenocytoids and prohemocytes - based on microscopic studies of surface-attached  
330 cells. Our GO analyses suggested the presence of a PPO-specialized cell population and a  
331 second cell subset of a less specific nature. Based on that, we reasoned that PPO6<sup>high</sup> and  
332 PPO6<sup>low</sup> cell groups could be representatives of oenocytoids and granulocytes, respectively. As  
333 phagocytosis is a hallmark of granulocytes, we first explored functional differences between these  
334 cells using magnetic bead uptake as means for “phagocyte” isolation, as suggested before (Smith  
335 et al., 2016). To this end, we injected mosquitoes with magnetic beads and either allowed them  
336 to rest at 28°C prior to hemolymph perfusion or incubated the mosquitoes at 4°C to inhibit  
337 phagocytosis. To our surprise, both PPO6<sup>high</sup> and PPO6<sup>low</sup> cells were identified among  
338 magnetically isolated cells and under both conditions, suggesting that instead of phagocytosis,  
339 both cell types endocytosed the beads, as no differences in bead uptake were observed when  
340 this assay was performed under cold conditions (Figure 4A, arrows). To confirm these findings,  
341 we compared the gene profiles of PPO-producing cells to the proteomics results obtained by  
342 Smith et al using magnetic bead isolation at 28°C only (Smith et al., 2016). Our analyses revealed  
343 that similarities were the strongest when profiles were compared across all samples - PPO6<sup>high</sup>,  
344 PPO6<sup>low</sup>, phagocytes and all cells, i.e. unselected cells obtained in the absence of magnetic  
345 isolation. PPO6<sup>high</sup> and PPO6<sup>low</sup> shared expression of more genes with phagocytes when  
346 considered together rather than alone, indicating that neither PPO6<sup>high</sup> and PPO6<sup>low</sup> cell types  
347 shared striking similarities with phagocytes at the gene/protein level (Figure 4B). In agreement,  
348 nearly all PPOs were present in all samples (Figure 4B'). Overall, these findings did not detect  
349 functional differences between PPO6<sup>high</sup> and PPO6<sup>low</sup> cells. We conclude that endocytic  
350 capabilities likely characterize both granulocytes, considered the “true” phagocytic cell type, and  
351 oenocytoids, known as the major source of PPOs.

352 Next, we sought to investigate whether the identified cell populations could be distinguished  
353 based on their morphology using imaging flow cytometry and RFP fluorescence as a proxy for  
354 *PPO6* expression. We measured a series of morphological features of 319 single RFP-positive  
355 cells, which could be divided into RFP<sup>high</sup> (PPO6<sup>high</sup>, n=58) and RFP<sup>low</sup> (PPO6<sup>low</sup>, n=261) based  
356 on their fluorescence intensity (Figures 4C-D and Figure S3). Overall, RFP-positive cells had a  
357 mean area of approximately 67  $\mu\text{m}^2$ , ranging from 18  $\mu\text{m}^2$  to nearly 140  $\mu\text{m}^2$ . These  
358 measurements are in accordance with cell sizes reported elsewhere (Bryant and Michel, 2014,  
359 2016; Castillo et al., 2006). Similar to recent studies based on flow cytometry of fixed cells (Bryant

360 and Michel, 2014, 2016), we did not detect the cells of 2  $\mu\text{m}$  in size described by other research  
361 groups based on label-free light microscopy alone (Rodrigues et al., 2010; Smith et al., 2015).  
362 When comparing the cell groups in terms of bright-field measurements of their cytoplasm (see  
363 Methods), PPO6<sup>low</sup> cells showed smaller cytoplasmic area, width, and minor axis than PPO6<sup>high</sup>  
364 cells (Figure 4E and Figure S3). No differences between the groups were detected in granularity  
365 or cell shape (Figure S8 and Table S5). To our surprise, PPO6<sup>high</sup> and PPO6<sup>low</sup> cells were equally  
366 circular. At times, cells from both groups also displayed an elongated shape, typical of the  
367 cytoplasmic extensions seen in fusiform or spindle-shaped cells. This fusiform shape is  
368 characteristic of plasmatocytes, described in other insects (Ribeiro and Brehelin, 2006). These  
369 results failed to morphologically assign RFP-positive cells to any of the morphologically-defined  
370 groups: granulocytes, plasmatocytes, or oenocytoids. In fact, the highest discriminating factors  
371 (Fisher's linear discriminant, see Methods) separating PPO6<sup>high</sup> and PPO6<sup>low</sup> subpopulations  
372 relied on RFP intensity alone, with bright-field parameters scoring poorly and failing to establish  
373 a morphological distinction between the cells (Table S6). Importantly, our imaging flow cytometry  
374 approach relied on morphological analyses of cells in suspension, which is unbiased and likely  
375 more relevant for the identification of the cellular types found in the hemolymph circulation. This  
376 might explain differences obtained relative to previous studies that focused on cells attached to  
377 glass slides, which might be rather reflective of cell 'states' driven by activation of the cellular  
378 attachment and adhesion machineries upon exposure to electrostatically charged glass.

379 In addition to RFP intensity, the cell groups differed in their RFP area. PPO6<sup>high</sup> cells displayed  
380 an overall cytoplasmic distribution of the RFP signal, whereas a more localized and globular signal  
381 was detected in the cytoplasm of PPO6<sup>low</sup> cells, where RFP lobes were also more numerous,  
382 reinforcing the localized nature of the RFP signal (Figure 4D-E). Microscopic examination also  
383 revealed that nearly half of the cells from both groups displayed internal structures and or  
384 "budding" extensions of the cytoplasm suggestive of vesicles (Figure 4F-G, arrowhead and arrow,  
385 respectively). To confirm that, we performed correlative scanning electron microscopy (SEM) and  
386 demonstrated the presence of membrane protrusions or "blebs" in RFP-positive cells (Figure  
387 S4A). Altogether, these results established that morphological plasticity of the mosquito blood  
388 cells is independent from their transcriptional profile, and that mosquito blood cells have  
389 membrane vesicles and protrusions.

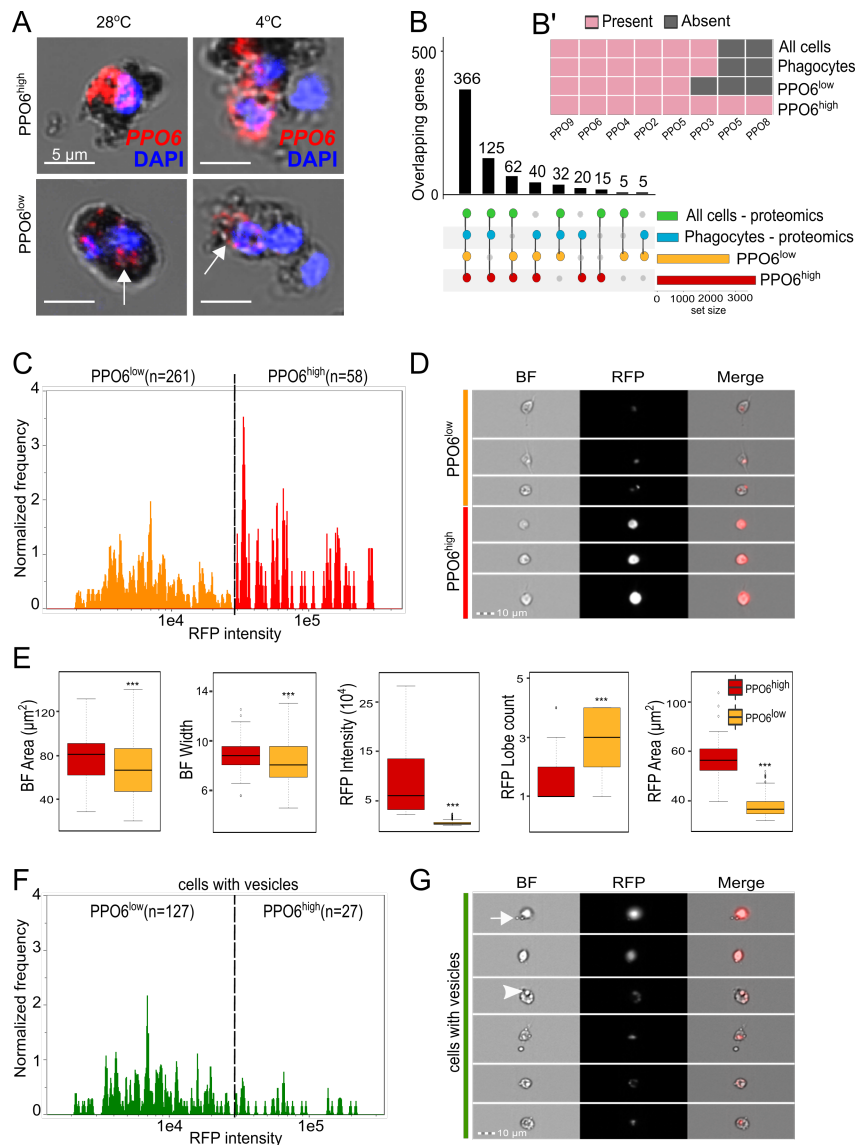

390

391 **Figure 4: PPO6<sup>high</sup> and PPO6<sup>low</sup> cell subpopulations share functional and morphological**  
 392 **features.** (A) Magnetic bead isolation assays followed by RNA-FISH for identification of cell  
 393 subpopulations. Arrows indicate lower *PPO6* signal. (B) Intersection analyses between PPO6<sup>high</sup>  
 394 and PPO6<sup>low</sup> cell subpopulations and proteomics results obtained by Smith et al for phagocytes  
 395 and all cells (unselected). Presence or absence of PPO genes/proteins in each of the samples in  
 396 shown in (B'). (C) Hemocytes were perfused from *PPO6::RFP* mosquitoes and analyzed using  
 397 imaging flow cytometry. RFP-positive cells were identified by their RFP Median Pixel and further  
 398 separated into PPO6<sup>high</sup> and PPO6<sup>low</sup> based on their level of RFP fluorescence. The number of  
 399 cells analyzed per group is shown between parentheses and the dotted line indicates the RFP  
 400 threshold level used for separation of the two populations. (D) Image gallery containing



401 representative images of PPO6<sup>high</sup> and PPO6<sup>low</sup> populations. Variation in cell shape and RFP  
402 intensity can be observed in the bright field (BF), RFP and merged images. (E) For every event  
403 measured within the flow, a corresponding image and fluorescence levels were acquired and  
404 analyzed to generate multiple morphological features. Boxplots show the distribution of five  
405 morphological measurements according to the groups. Asterisks represent  $p < 0.01$  based on  
406 Mann-Whitney-Wilcoxon test. (F) RFP-positive cells were interrogated for the presence of  
407 membrane protrusions or internal structures suggestive of vesicles. Similar to (C), cells were  
408 grouped into PPO6<sup>high</sup> and PPO6<sup>low</sup> and a RFP intensity histogram of cells displaying vesicles  
409 (green population) was generated to illustrate that vesicles are observed in cells from both groups.  
410 Representative images of cells in this population subset are shown in (G). Arrow and arrowhead  
411 indicate representative membrane protrusions and internal vesicles, respectively. See also Figure  
412 S4 and Tables S4-5. Boxplots indicate the median, first and third quartile, and min and max  
413 values.

414

#### 415 **Mosquito blood cells exchange molecular information**

416 Mosquito hemocytes have been described to produce and secrete EVs (Castillo et al., 2017;  
417 Hillyer and Christensen, 2002) and, in agreement, our initial observation suggested that PPO-  
418 producing cells display vesicles. We were, therefore, puzzled by the possibility that the RFP signal  
419 analyzed in our cell sorting approach could have partially originated from RFP-positive vesicles.  
420 Earlier reports used DiD, a lipophilic cyanine dye, to label both mosquito hemocytes and  
421 hemocyte-derived vesicles (Castillo et al., 2017; King and Hillyer, 2012). To test whether the  
422 localized RFP signal seen in our imaging flow cytometry was associated with vesicles, we first  
423 stained PPO-producing cells with DiD and observed that RFP-positive cells indeed contained  
424 DiD-positive membrane-bound and internal vesicles that were both RFP-positive and negative  
425 (Figure S4B-C). Recently, it has also become clear that EVs are present in extracellular fluids like  
426 milk, saliva and plasma, so we reasoned that EVs might be also found in the hemolymph and in  
427 association with RFP-negative cells. To identify EVs in the mosquito circulation, we performed  
428 imaging flow cytometry analyses using DiD and a recently published approach (Headland et al.,  
429 2014). Both DiD-positive cells and EVs could be identified in hemolymph perfusate (Figure 5A-  
430 B). EVs were detected based on their small size, weak dark-field and positive DiD fluorescence,  
431 with a few EVs also displaying weak RFP signal (Figure 5B, arrowhead). The degree of DiD  
432 intensity differed between cells and did not depend on RFP fluorescence. Differential

433 centrifugation followed by electron microscopy confirmed the presence of EVs in hemolymph  
434 perfusate of naïve female mosquitoes (Figure 5C). Moreover, SEM of perfused cells also revealed  
435 that vesicles of different sizes and shapes, suggestive of the different vesicle types described in  
436 the literature - exosomes, microvesicles and apoptotic vesicles (van der Pol et al., 2012), could  
437 be indeed observed in association with naïve mosquito blood cells (Figure S4D). These findings  
438 suggested that extracellular vesicle production is a general phenomenon that is not limited to  
439 PPO-associated cells.

440 A growing body of evidence has demonstrated that RNA can be transferred between mammalian  
441 cells. As RNA can be found in EVs, and our data showed that EVs are present in the mosquito  
442 hemolymph, we decided to take a step further and explore the possibility that a crosstalk between  
443 PPO-positive and negative cells could be responsible for the identification of PPO6<sup>high</sup> and  
444 PPO6<sup>low</sup> cells. Strengthening this idea were the observations that (1) our scRNA-seq results  
445 uncovered cells with minute levels of *PPO6* and *RFP*, and (2) expression of *PPO6* by RNA-FISH  
446 was detected inside “budding” extensions associated with PPO6-positive cells (Figure 5D). As a  
447 proof of concept, a transwell assay using blood cells from *PPO6::RFP* transgenic and wild-type  
448 mosquitoes was developed to test the possibility that RFP mRNA can be transferred between  
449 naïve transgenic and wild-type blood cells (Figure 5E). Remarkably, *RFP* transcripts were  
450 observed by RNA-FISH inside wild-type blood cells after exposure to hemolymph perfusate from  
451 transgenic mosquitoes (Figure 5F, arrowhead). This result indicated that *RFP* mRNAs can be  
452 shuttled between blood cells and might account for the PPO6<sup>low</sup> cell population uncovered by our  
453 scRNA-seq and imaging approaches. Taken together, our findings demonstrated that molecular  
454 exchange between cells, likely via EVs, can affect their transcriptional profile. As EVs have been  
455 shown to carry lipids, proteins and RNA, and can be secreted by virtually all cells, our results  
456 revealed an unappreciated role of intercellular molecular exchange in defining cellular identity.

457

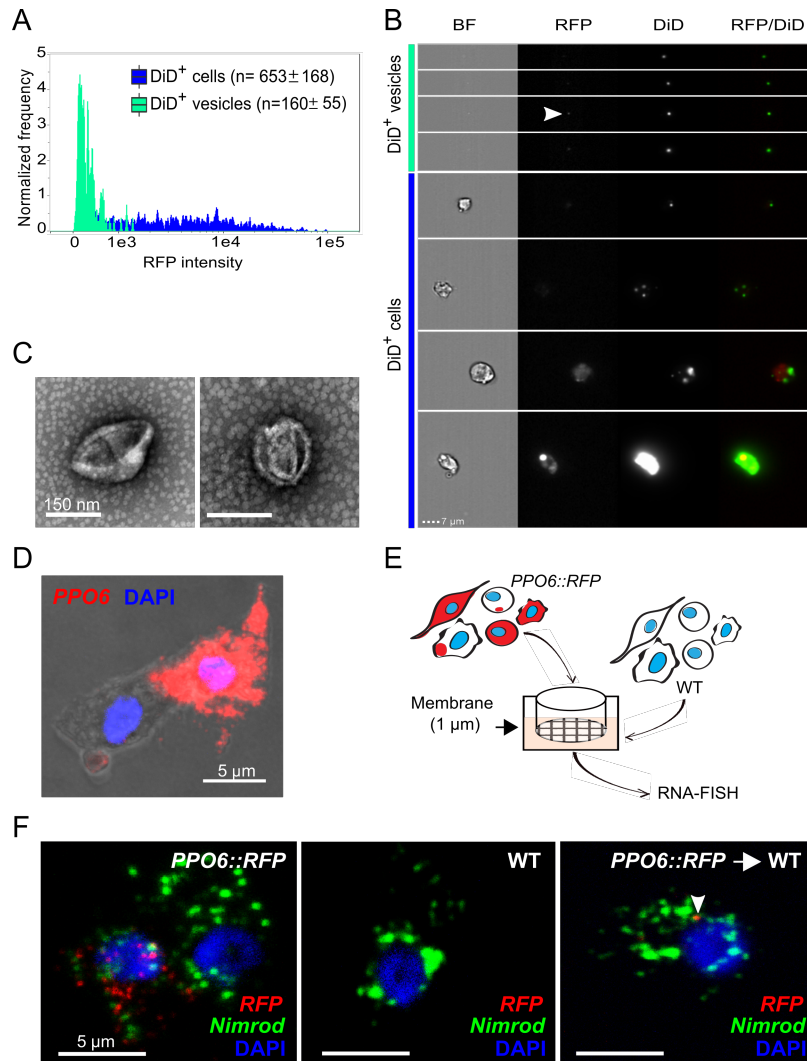

458

459 **Figure 5: Vesicle identification and molecular exchange in mosquito blood cells.**

460 Hemocytes were perfused from *PPO6::RFP* mosquitoes, stained with the lipophilic DiD dye and  
 461 analyzed using imaging flow cytometry. DiD-positive cells and EVs were first identified according  
 462 to their DiD and darkfield intensity. EVs were further separated from cells based on their small  
 463 bright field area. Cells were identified considering their area and aspect ratio. A RFP fluorescence  
 464 histogram for both DiD-positive cells and EVs in shown in (A). (B) Representative images of DiD-  
 465 positive cells and EVs. Arrowhead indicates a representative of a RFP-positive vesicle. (C)  
 466 Negative staining electron microscopy of vesicles obtained by differential centrifugation  
 467 (10,000xg) of hemolymph perfusate (representative images of 2 independent experiments are  
 468 shown). (D) *PPO6* mRNA detection by RNA-FISH within budding extensions of blood cells. (E)  
 469 Schematics of a transwell assay developed to test the transfer of *RFP* between blood cells from  
 470 *PPO6::RFP* transgenic mosquitoes and wild-type mosquitoes that do not express any reporter

471 genes. Hemolymph perfusate from wild-type mosquitoes was pipetted onto a coverslip placed  
472 under a 1  $\mu$ m membrane. Perfusate collected from *PPO6::RFP* mosquitoes was placed on top of  
473 the membrane. (F) RNA-FISH was performed on coverslips obtained from the transwell assay  
474 described in (E) using probes to detect *RFP* and *Nimrod* expression in wild-type acceptor cells  
475 (right panel, arrowhead). Representative images of 2 independent experiments are shown. See  
476 also Figure S4.

477

## 478 **DISCUSSION**

479 Understanding how transcriptional networks influence cell identity is a central problem in modern  
480 molecular biology. Our study describes mosquito blood cells as a source of key components of  
481 immunity, development and tissue homeostasis, and places these cells as a central hub  
482 coordinating mosquito biology at different levels. Using a combination of single-cell genomics and  
483 imaging, we revealed that hemocytes display an unexpected degree of complexity where two  
484 transcriptionally defined cellular ‘populations’ suggestive of distinct cell types share morphological  
485 and functional features. We also demonstrate that mosquito blood cells exchange mRNA, leading  
486 to the detection, by RNA-FISH, of an “exogenous” gene in acceptor cells. Altogether, our results  
487 open a new perspective on cellular crosstalk and cell type classification, in addition to illustrating  
488 the power of single-cell-based approaches in discovering unappreciated events at the core of  
489 biological processes.

490 Using single-cell RNA sequencing, we describe the baseline expression of a mosquito blood cell  
491 in exceptional detail. An average mosquito blood cell under resting conditions expresses  
492 approximately 1,000 genes, or 7% of the mosquito transcriptome. In total, about half of the genes  
493 currently annotated in the mosquito genome were detected by RNA sequencing naïve,  
494 unstimulated mosquito hemocytes. This represents a substantial gene expression resource for  
495 further studies of tissue-specific alternative splicing, RNA editing, gene and transcript models. It  
496 will also enable the establishment of transcriptional and regulatory networks that allow for more  
497 precise gene enrichment and functional studies. In mosquitoes, where tissue-specific gene  
498 knockdown is not available and transgenesis remains limited, functional analyses have greatly  
499 relied on the use of dsRNA injections into the open body cavity. This technical limitation restricts  
500 the interpretation of tissue-specificity of signaling pathways and their regulation. We believe our  
501 dataset will illustrate the importance of tissue specificity studies and pave the road towards the

502 detailed mapping of gene expression in cells and tissues of different systems, with the ultimate  
503 goal of creating a comprehensive reference atlas of cellular diversity.

504 By successfully applying single-cell RNA sequencing to the study of blood cells involved in  
505 immunity in a major malaria vector, we demonstrated proof of the existence of at least two  
506 transcriptionally distinct cell subpopulations that do not represent currently defined cell types. Our  
507 results show that the majority of *Anopheles* blood cells likely belong to the PPO6<sup>low</sup> type. Their  
508 rich transcriptional program appears to be reminiscent of granulocytes. The second  
509 subpopulation, with a transcriptional profile specialized in melanization, is suggestive of  
510 oenocytoids. Nonetheless, these two transcriptionally defined cell types could not be  
511 distinguished by the customary functional or morphological tests. Therefore, we propose to call  
512 them plasmatocytes and melanocytes. Interestingly, only one cell type, plasmatocytes, is  
513 described in the adult *Drosophila* flies. Our transcriptional definition of mosquito blood cells  
514 redefines the obscure cellular classification extensively used in studies of hemocytes, and is  
515 particularly significant in the context of cellular proliferation and differentiation because mosquito  
516 hemocyte lineages are still to be established. Given our results, it will be interesting to address  
517 the spatial distribution of mosquito blood cells based on the markers identified here, especially as  
518 no lymph glands or hematopoietic cell clusters have been described in mosquitoes. Tissue-  
519 resident blood cells likely contribute to local responses and help regulate tissue-specific events.  
520 This is exemplified by the recent discovery of macrophage subsets regulating electrical pulsing in  
521 the mouse heart (Hulsmans et al., 2017), and of ovarian hemocytes that control collagen IV  
522 secretion and germline stem cell niche maintenance in *Drosophila* (Van De Bor et al., 2015).  
523 Evidence that cellular heterogeneity can be recognized by profiling single insect blood cells, often  
524 called macrophage-like, emphasizes the notion that innate immune cells are far more  
525 heterogeneous than previously thought. As macrophages, along with other immune cells, have  
526 their evolutionary roots in similar cells in ancestral invertebrates (Buchmann, 2014; Dzik, 2014)  
527 and new cell types arise as a result of evolutionary processes (Arendt et al., 2016), the study of  
528 insect blood cells can help elucidate the origins of the immune system.

529 In humans and mice, distinct levels and patterns of fluorescence of cellular markers are widely  
530 used in microscopy and flow cytometry as a means to cell type classification. Cellular crosstalk  
531 may, however, affect such approaches. Acquisition of macrophage-derived “blebs” by  
532 lymphocytes has been described, resulting in misrepresentation of lymphocytes as macrophages  
533 in flow cytometry studies, and suggesting that these two cells may interact to control early  
534 responses in the lymph node (Gray et al., 2012). More importantly, translation of transferred

535 mRNAs into functional proteins has been demonstrated before (Valadi et al., 2007) along with the  
536 reprogramming of acceptor cells upon microvesicle-mediated exchange (Ratajczak et al., 2006).  
537 It is, therefore, intriguing to consider that expression of specific cellular markers might be  
538 influenced by EV uptake. In this scenario, signals sent via vesicles include protein-coding RNAs  
539 that are normally absent in acceptor cells, which once translated, appear to be an endogenous  
540 cellular marker characteristic of the donor cell population. This observation calls for a critical  
541 reassessment of cellular markers by the scientific community. It is also imperative to investigate  
542 whether certain protein-coding RNAs are preferentially exchanged compared to other RNAs found  
543 in the cells. How *PPO6* and *RFP* transcripts, and potentially other *PPO* genes, contribute to the  
544 function of acceptor cells is another exciting question. PPO proteins lack the signal peptides  
545 required for their secretion, and it has been suggested that PPO6 is secreted by exocytosis as  
546 cell rupture has not been observed (Bryant and Michel, 2016). It is plausible that PPO transcripts  
547 are shed by professional melanocytes and processed by non-professional plasmatocytes that  
548 locally activate melanization only under specific conditions, e.g. upon infection with specific  
549 pathogens, or during wounding and tissue repair. Molecular signals exchanged between cells  
550 can, thus, coordinate cellular plasticity and account for the diversity of functional subsets or  
551 'hybrid' cells that express markers of different or multiple cell types.

552 The demonstration of mosquito blood-borne EVs indicates that different cells and tissues likely  
553 communicate through vesicles secreted into the insect open circulatory system. Several recent  
554 reports have suggested EV-mediated immune responses in dipteran insects. Exosome-like  
555 vesicles containing virus-derived siRNAs have been identified in *Drosophila* and contribute to  
556 systemic antiviral immunity (Tassetto et al., 2017). Apoptotic vesicles released by hemocytes in  
557 the proximity of invading parasites have been implicated in anti-*Plasmodium* responses by  
558 activating the complement pathway in *A. gambiae* mosquitoes (Castillo et al., 2017). Interestingly,  
559 using a GFP reporter strain, Volohonsky et al recently reported that, the anti-malaria mosquito  
560 complement-like factor TEP1 is predominately expressed in the fat body as a transcript, but at  
561 the protein level it is found in hemocytes upon blood feeding and infection (Volohonsky et al.,  
562 2017). The authors speculate this is due to the uptake by the blood cells of TEP1 attached to  
563 bacterial cells. As only one plasmatocyte containing low levels of *TEP1* was identified in our  
564 sequencing, we suggest that EV-mediated delivery of TEP1 (mRNA or protein) may better explain  
565 these surprising findings. We propose that vesicles found in the mosquito hemolymph contain  
566 proteins and transcripts that coordinate cell-to-cell and tissue communication not only in infection  
567 but also under physiological conditions. Disturbance in homeostasis, be it by infection, metabolic

568 changes, tissue damage or stress, may further escalate secretion of vesicles containing an array  
569 of different cargo that can be targeted to specific tissues and complement systemic responses.  
570 This represents an outstanding parallel between insects and humans, where EVs found in human  
571 body fluids can elicit changes in function and gene expression in target cells, and have a direct  
572 role in processes like differentiation, neuronal signaling and cancer. We believe that, similar to  
573 how environment, microbiota and genetic make-up influence phenotypic variation, cellular  
574 exchange can also drive cellular identity and represents an inventive and unexplored way through  
575 which nature coordinates who and what we are.

576

## 577 **ACKNOWLEDGMENTS**

578 The authors thank Suzana Zakoviz for sharing the drawing in Figure 1, and all members of the  
579 Vector Biology Unit for intellectual input and technical support. The authors are grateful to Dr. N.  
580 Regev-Rudzki for discussions and critical reading of the manuscript. The authors thank Dr. E.  
581 Marois (UPR9022 CNRS, U963 Inserm, France) for sharing the transgenic *PPO6::RFP* line, Dr.  
582 K. Müller (Humboldt University, Berlin) for providing *Anopheles stephensi* mosquitoes and  
583 acknowledge the discussions in the frame of the CNRS LIA "REL2 and resistance to malaria"  
584 project. We also acknowledge the support provided by the Flow Cytometry Core Facility  
585 (DRFZ/MPIIB, Berlin) and by Dr. I. Wagner (the Microarrays Core Facility, MPIIB, Berlin).

586

## 587 **AUTHOR CONTRIBUTIONS**

588 M.S.S. and E.A.L. conceived the study, designed the experiments, analyzed the data and wrote  
589 the manuscript. M.S.S. performed all experiments with assistance from R.L.L. for the imaging flow  
590 cytometry studies, C.G. and V.B. for the EM analyses, and P.C. for the scRNA-seq. M.S.S. and  
591 J.J.M.L. performed bioinformatics analyses. J.H. developed web interface for data interrogation.  
592 A.E.H. provided infrastructure. V.B. and S.A.T. provided expert input.

593

## 594 **DECLARATION OF INTERESTS**

595 The authors declare no competing interests.

596

597 **REFERENCES**

598 Abraham, E.G., Pinto, S.B., Ghosh, A., Vanlandingham, D.L., Budd, A., Higgs, S., Kafatos, F.C.,  
599 Jacobs-Lorena, M., and Michel, K. (2005). An immune-responsive serpin, SRPN6, mediates  
600 mosquito defense against malaria parasites. *Proceedings of the National Academy of Sciences*  
601 *of the United States of America* 102, 16327-16332.

602 Alexa, A., Rahnenfuhrer, J., and Lengauer, T. (2006). Improved scoring of functional groups from  
603 gene expression data by decorrelating GO graph structure. *Bioinformatics* 22, 1600-1607.

604 Arendt, D., Musser, J.M., Baker, C.V., Bergman, A., Cepko, C., Erwin, D.H., Pavlicev, M.,  
605 Schlosser, G., Widder, S., Laubichler, M.D., *et al.* (2016). The origin and evolution of cell types.  
606 *Nature reviews Genetics* 17, 744-757.

607 Baker, S.C., Bauer, S.R., Beyer, R.P., Brenton, J.D., Bromley, B., Burrill, J., Causton, H., Conley,  
608 M.P., Elespuru, R., Fero, M., *et al.* (2005). The External RNA Controls Consortium: a progress  
609 report. *Nat Methods* 2, 731-734.

610 Baton, L.A., Robertson, A., Warr, E., Strand, M.R., and Dimopoulos, G. (2009). Genome-wide  
611 transcriptomic profiling of *Anopheles gambiae* hemocytes reveals pathogen-specific signatures  
612 upon bacterial challenge and *Plasmodium berghei* infection. *BMC genomics* 10, 257.

613 Bergin, D., Reeves, E.P., Renwick, J., Wientjes, F.B., and Kavanagh, K. (2005). Superoxide  
614 production in *Galleria mellonella* hemocytes: identification of proteins homologous to the NADPH  
615 oxidase complex of human neutrophils. *Infection and immunity* 73, 4161-4170.

616 Blandin, S., Shiao, S.H., Moita, L.F., Janse, C.J., Waters, A.P., Kafatos, F.C., and Levashina,  
617 E.A. (2004). Complement-like protein TEP1 is a determinant of vectorial capacity in the malaria  
618 vector *Anopheles gambiae*. *Cell* 116, 661-670.

619 Brandt, S.M., Jaramillo-Gutierrez, G., Kumar, S., Barillas-Mury, C., and Schneider, D.S. (2008).  
620 Use of a *Drosophila* model to identify genes regulating *Plasmodium* growth in the mosquito.  
621 *Genetics* 180, 1671-1678.



- 622 Braun, A., Lemaitre, B., Lanot, R., Zachary, D., and Meister, M. (1997). *Drosophila* immunity:  
623 analysis of larval hemocytes by P-element-mediated enhancer trap. *Genetics* *147*, 623-634.
- 624 Brayner, F.A., Araujo, H.R., Cavalcanti, M.G., Alves, L.C., and Peixoto, C.A. (2005).  
625 Ultrastructural characterization of the hemocytes of *Culex quinquefasciatus* (DIPTERA:  
626 Culicidae). *Micron* *36*, 359-367.
- 627 Brennecke, P., Anders, S., Kim, J.K., Kolodziejczyk, A.A., Zhang, X., Proserpio, V., Baying, B.,  
628 Benes, V., Teichmann, S.A., Marioni, J.C., *et al.* (2013). Accounting for technical noise in single-  
629 cell RNA-seq experiments. *Nat Methods* *10*, 1093-1095.
- 630 Browne, N., Heelan, M., and Kavanagh, K. (2013). An analysis of the structural and functional  
631 similarities of insect hemocytes and mammalian phagocytes. *Virulence* *4*, 597-603.
- 632 Bryant, W.B., and Michel, K. (2014). Blood feeding induces hemocyte proliferation and activation  
633 in the African malaria mosquito, *Anopheles gambiae* Giles. *The Journal of experimental biology*  
634 *217*, 1238-1245.
- 635 Bryant, W.B., and Michel, K. (2016). *Anopheles gambiae* hemocytes exhibit transient states of  
636 activation. *Developmental and comparative immunology* *55*, 119-129.
- 637 Buchmann, K. (2014). Evolution of Innate Immunity: Clues from Invertebrates via Fish to  
638 Mammals. *Frontiers in immunology* *5*, 459.
- 639 Castillo, J.C., Ferreira, A.B.B., Trisnadi, N., and Barillas-Mury, C. (2017). Activation of mosquito  
640 complement antiplasmodial response requires cellular immunity. *Sci Immunol* *2*.
- 641 Castillo, J.C., Robertson, A.E., and Strand, M.R. (2006). Characterization of hemocytes from the  
642 mosquitoes *Anopheles gambiae* and *Aedes aegypti*. *Insect biochemistry and molecular biology*  
643 *36*, 891-903.
- 644 Christensen, B.M., Li, J., Chen, C.C., and Nappi, A.J. (2005). Melanization immune responses in  
645 mosquito vectors. *Trends in parasitology* *21*, 192-199.
- 646 Costa, S.C., Ribeiro, C., Girard, P.A., Zumbihl, R., and Brehelin, M. (2005). Modes of  
647 phagocytosis of Gram-positive and Gram-negative bacteria by *Spodoptera littoralis* granular  
648 haemocytes. *J Insect Physiol* *51*, 39-46.

- 649 Dobin, A., Davis, C.A., Schlesinger, F., Drenkow, J., Zaleski, C., Jha, S., Batut, P., Chaisson, M.,  
650 and Gingeras, T.R. (2013). STAR: ultrafast universal RNA-seq aligner. *Bioinformatics* 29, 15-21.
- 651 Dong, Y., and Dimopoulos, G. (2009). Anopheles fibrinogen-related proteins provide expanded  
652 pattern recognition capacity against bacteria and malaria parasites. *The Journal of biological*  
653 *chemistry* 284, 9835-9844.
- 654 Dudzic, J.P., Kondo, S., Ueda, R., Bergman, C.M., and Lemaitre, B. (2015). *Drosophila* innate  
655 immunity: regional and functional specialization of prophenoloxidasases. *BMC biology* 13, 81.
- 656 Dzik, J.M. (2014). Evolutionary roots of arginase expression and regulation. *Frontiers in*  
657 *immunology* 5, 544.
- 658 Estevez-Lao, T.Y., and Hillyer, J.F. (2014). Involvement of the *Anopheles gambiae* Nimrod gene  
659 family in mosquito immune responses. *Insect biochemistry and molecular biology* 44, 12-22.
- 660 Fossett, N., Hyman, K., Gajewski, K., Orkin, S.H., and Schulz, R.A. (2003). Combinatorial  
661 interactions of serpent, lozenge, and U-shaped regulate crystal cell lineage commitment during  
662 *Drosophila* hematopoiesis. *Proceedings of the National Academy of Sciences of the United States*  
663 *of America* 100, 11451-11456.
- 664 Frolet, C., Thoma, M., Blandin, S., Hoffmann, J.A., and Levashina, E.A. (2006). Boosting NF-  
665 kappaB-dependent basal immunity of *Anopheles gambiae* aborts development of *Plasmodium*  
666 *berghei*. *Immunity* 25, 677-685.
- 667 Gaublotme, J.T., Yosef, N., Lee, Y., Gertner, R.S., Yang, L.V., Wu, C., Pandolfi, P.P., Mak, T.,  
668 Satija, R., Shalek, A.K., *et al.* (2015). Single-Cell Genomics Unveils Critical Regulators of Th17  
669 Cell Pathogenicity. *Cell* 163, 1400-1412.
- 670 Gray, E.E., Friend, S., Suzuki, K., Phan, T.G., and Cyster, J.G. (2012). Subcapsular sinus  
671 macrophage fragmentation and CD169+ bleb acquisition by closely associated IL-17-committed  
672 innate-like lymphocytes. *PloS one* 7, e38258.
- 673 Grun, D., Lyubimova, A., Kester, L., Wiebrands, K., Basak, O., Sasaki, N., Clevers, H., and van  
674 Oudenaarden, A. (2015). Single-cell messenger RNA sequencing reveals rare intestinal cell  
675 types. *Nature* 525, 251-255.

- 676 Headland, S.E., Jones, H.R., D'Sa, A.S., Perretti, M., and Norling, L.V. (2014). Cutting-edge  
677 analysis of extracellular microparticles using ImageStream(X) imaging flow cytometry. *Sci Rep* 4,  
678 5237.
- 679 Hernandez, S., Lanz, H., Rodriguez, M.H., Torres, J.A., Martinez-Palomo, A., and Tsutsumi, V.  
680 (1999). Morphological and cytochemical characterization of female *Anopheles albimanus*  
681 (Diptera: Culicidae) hemocytes. *Journal of medical entomology* 36, 426-434.
- 682 Hillyer, J.F. (2010). Mosquito immunity. *Advances in experimental medicine and biology* 708, 218-  
683 238.
- 684 Hillyer, J.F., and Christensen, B.M. (2002). Characterization of hemocytes from the yellow fever  
685 mosquito, *Aedes aegypti*. *Histochemistry and cell biology* 117, 431-440.
- 686 Hillyer, J.F., Schmidt, S.L., and Christensen, B.M. (2003). Rapid phagocytosis and melanization  
687 of bacteria and *Plasmodium* sporozoites by hemocytes of the mosquito *Aedes aegypti*. *The*  
688 *Journal of parasitology* 89, 62-69.
- 689 Hillyer, J.F., and Strand, M.R. (2014). Mosquito hemocyte-mediated immune responses. *Current*  
690 *Opinion in Insect Science*.
- 691 Hulsmans, M., Clauss, S., Xiao, L., Aguirre, A.D., King, K.R., Hanley, A., Hucker, W.J., Wulfers,  
692 E.M., Seemann, G., Courties, G., *et al.* (2017). Macrophages Facilitate Electrical Conduction in  
693 the Heart. *Cell* 169, 510-522 e520.
- 694 Ilicic, T., Kim, J.K., Kolodziejczyk, A.A., Bagger, F.O., McCarthy, D.J., Marioni, J.C., and  
695 Teichmann, S.A. (2016). Classification of low quality cells from single-cell RNA-seq data. *Genome*  
696 *Biol* 17, 29.
- 697 King, J.G., and Hillyer, J.F. (2012). Infection-induced interaction between the mosquito circulatory  
698 and immune systems. *PLoS pathogens* 8, e1003058.
- 699 King, J.G., and Hillyer, J.F. (2013). Spatial and temporal in vivo analysis of circulating and sessile  
700 immune cells in mosquitoes: hemocyte mitosis following infection. *BMC biology* 11, 55.
- 701 Kowal, J., Arras, G., Colombo, M., Jouve, M., Morath, J.P., Primdal-Bengtson, B., Dingli, F., Loew,  
702 D., Tkach, M., and Thery, C. (2016). Proteomic comparison defines novel markers to characterize

- 703 heterogeneous populations of extracellular vesicle subtypes. Proceedings of the National  
704 Academy of Sciences of the United States of America *113*, E968-977.
- 705 Lavine, M.D., and Strand, M.R. (2002). Insect hemocytes and their role in immunity. Insect  
706 biochemistry and molecular biology *32*, 1295-1309.
- 707 Lawson, D., Arensburger, P., Atkinson, P., Besansky, N.J., Bruggner, R.V., Butler, R., Campbell,  
708 K.S., Christophides, G.K., Christley, S., Dialynas, E., *et al.* (2007). VectorBase: a home for  
709 invertebrate vectors of human pathogens. Nucleic Acids Res *35*, D503-505.
- 710 Lombardo, F., Ghani, Y., Kafatos, F.C., and Christophides, G.K. (2013). Comprehensive genetic  
711 dissection of the hemocyte immune response in the malaria mosquito *Anopheles gambiae*. PLoS  
712 pathogens *9*, e1003145.
- 713 Love, M.I., Huber, W., and Anders, S. (2014). Moderated estimation of fold change and dispersion  
714 for RNA-seq data with DESeq2. Genome Biol *15*, 550.
- 715 Michel, K., Budd, A., Pinto, S., Gibson, T.J., and Kafatos, F.C. (2005). *Anopheles gambiae*  
716 SRPN2 facilitates midgut invasion by the malaria parasite *Plasmodium berghei*. EMBO reports *6*,  
717 891-897.
- 718 Minakhina, S., Tan, W., and Steward, R. (2011). JAK/STAT and the GATA factor Pannier control  
719 hemocyte maturation and differentiation in *Drosophila*. Developmental biology *352*, 308-316.
- 720 Ottaviani, E., and Franceschi, C. (1997). The invertebrate phagocytic immunocyte: clues to a  
721 common evolution of immune and neuroendocrine systems. Immunology today *18*, 169-174.
- 722 Picelli, S., Bjorklund, A.K., Faridani, O.R., Sagasser, S., Winberg, G., and Sandberg, R. (2013).  
723 Smart-seq2 for sensitive full-length transcriptome profiling in single cells. Nat Methods *10*, 1096-  
724 1098.
- 725 Pinto, S.B., Lombardo, F., Koutsos, A.C., Waterhouse, R.M., McKay, K., An, C., Ramakrishnan,  
726 C., Kafatos, F.C., and Michel, K. (2009). Discovery of *Plasmodium* modulators by genome-wide  
727 analysis of circulating hemocytes in *Anopheles gambiae*. Proceedings of the National Academy  
728 of Sciences of the United States of America *106*, 21270-21275.

- 729 Ratajczak, J., Miekus, K., Kucia, M., Zhang, J., Reca, R., Dvorak, P., and Ratajczak, M.Z. (2006).  
730 Embryonic stem cell-derived microvesicles reprogram hematopoietic progenitors: evidence for  
731 horizontal transfer of mRNA and protein delivery. *Leukemia* 20, 847-856.
- 732 Ribeiro, C., and Brehelin, M. (2006). Insect haemocytes: what type of cell is that? *J Insect Physiol*  
733 52, 417-429.
- 734 Rodrigues, J., Brayner, F.A., Alves, L.C., Dixit, R., and Barillas-Mury, C. (2010). Hemocyte  
735 differentiation mediates innate immune memory in *Anopheles gambiae* mosquitoes. *Science* 329,  
736 1353-1355.
- 737 Shalek, A.K., Satija, R., Adiconis, X., Gertner, R.S., Gaublomme, J.T., Raychowdhury, R.,  
738 Schwartz, S., Yosef, N., Malboeuf, C., Lu, D., *et al.* (2013). Single-cell transcriptomics reveals  
739 bimodality in expression and splicing in immune cells. *Nature* 498, 236-240.
- 740 Shalek, A.K., Satija, R., Shuga, J., Trombetta, J.J., Gennert, D., Lu, D., Chen, P., Gertner, R.S.,  
741 Gaublomme, J.T., Yosef, N., *et al.* (2014). Single-cell RNA-seq reveals dynamic paracrine control  
742 of cellular variation. *Nature* 510, 363-369.
- 743 Smith, R.C., Barillas-Mury, C., and Jacobs-Lorena, M. (2015). Hemocyte differentiation mediates  
744 the mosquito late-phase immune response against *Plasmodium* in *Anopheles gambiae*.  
745 *Proceedings of the National Academy of Sciences of the United States of America* 112, E3412-  
746 3420.
- 747 Smith, R.C., King, J.G., Tao, D., Zeleznik, O.A., Brando, C., Thallinger, G.G., and Dinglasan, R.R.  
748 (2016). Molecular profiling of phagocytic immune cells in *Anopheles gambiae* reveals integral  
749 roles for hemocytes in mosquito innate immunity. *Mol Cell Proteomics*.
- 750 Tassetto, M., Kunitomi, M., and Andino, R. (2017). Circulating Immune Cells Mediate a Systemic  
751 RNAi-Based Adaptive Antiviral Response in *Drosophila*. *Cell* 169, 314-325 e313.
- 752 Tsao, I.Y., Chen, J.W., Li, C.J., Lo, H.L., Christensen, B.M., and Chen, C.C. (2015). The dual  
753 roles of *Armigeres subalbatus* prophenoloxidase V in parasite melanization and egg chorion  
754 melanization in the mosquito *Ar. subalbatus*. *Insect biochemistry and molecular biology* 64, 68-  
755 77.

- 756 Tsao, I.Y., Lin, U.S., Christensen, B.M., and Chen, C.C. (2009). Armigeres subalbatus  
757 prophenoloxidase III: Cloning, characterization and potential role in morphogenesis. *Insect*  
758 *biochemistry and molecular biology* 39, 96-104.
- 759 Valadi, H., Ekstrom, K., Bossios, A., Sjostrand, M., Lee, J.J., and Lotvall, J.O. (2007). Exosome-  
760 mediated transfer of mRNAs and microRNAs is a novel mechanism of genetic exchange between  
761 cells. *Nat Cell Biol* 9, 654-659.
- 762 Van De Bor, V., Zimniak, G., Papone, L., Cerezo, D., Malbouyres, M., Juan, T., Ruggiero, F., and  
763 Noselli, S. (2015). Companion Blood Cells Control Ovarian Stem Cell Niche Microenvironment  
764 and Homeostasis. *Cell reports* 13, 546-560.
- 765 van der Pol, E., Boing, A.N., Harrison, P., Sturk, A., and Nieuwland, R. (2012). Classification,  
766 functions, and clinical relevance of extracellular vesicles. *Pharmacol Rev* 64, 676-705.
- 767 Vlisidou, I., and Wood, W. (2015). Drosophila blood cells and their role in immune responses.  
768 *FEBS J* 282, 1368-1382.
- 769 Volohonsky, G., Hopp, A.K., Saenger, M., Soichot, J., Scholze, H., Boch, J., Blandin, S.A., and  
770 Marois, E. (2017). Transgenic Expression of the Anti-parasitic Factor TEP1 in the Malaria  
771 Mosquito *Anopheles gambiae*. *PLoS pathogens* 13, e1006113.
- 772 Volohonsky, G., Terenzi, O., Soichot, J., Naujoks, D.A., Nolan, T., Windbichler, N., Kapps, D.,  
773 Smidler, A.L., Vittu, A., Costa, G., *et al.* (2015). Tools for *Anopheles gambiae* Transgenesis. *G3*  
774 (Bethesda) 5, 1151-1163.
- 775 WHO (2014). A global brief on vector-borne diseases, W.H. Organization, ed. (Geneva,  
776 Switzerland: WHO Press).
- 777 Wood, W., and Jacinto, A. (2007). *Drosophila melanogaster* embryonic haemocytes: masters of  
778 multitasking. *Nat Rev Mol Cell Biol* 8, 542-551.
- 779 Wu, A.R., Neff, N.F., Kalisky, T., Dalerba, P., Treutlein, B., Rothenberg, M.E., Mburu, F.M.,  
780 Mantalas, G.L., Sim, S., Clarke, M.F., *et al.* (2014). Quantitative assessment of single-cell RNA-  
781 sequencing methods. *Nat Methods* 11, 41-46.

782 Xue, Z., Huang, K., Cai, C., Cai, L., Jiang, C.Y., Feng, Y., Liu, Z., Zeng, Q., Cheng, L., Sun, Y.E.,  
783 *et al.* (2013). Genetic programs in human and mouse early embryos revealed by single-cell RNA  
784 sequencing. *Nature* 500, 593-597.

785 Yassine, H., Kamareddine, L., and Osta, M.A. (2012). The mosquito melanization response is  
786 implicated in defense against the entomopathogenic fungus *Beauveria bassiana*. *PLoS*  
787 *pathogens* 8, e1003029.

788 Zdobnov, E.M., von Mering, C., Letunic, I., Torrents, D., Suyama, M., Copley, R.R., Christophides,  
789 G.K., Thomasova, D., Holt, R.A., Subramanian, G.M., *et al.* (2002). Comparative genome and  
790 proteome analysis of *Anopheles gambiae* and *Drosophila melanogaster*. *Science* 298, 149-159.

791

792

## 793 **MATERIALS and METHODS**

### 794 **Mosquito rearing, fluorescence microscopy and hemolymph perfusion**

795 *Anopheles gambiae sensu lato PPO6::RFP* transgenic (Volohonsky et al., 2015) and wild type  
796 strains were reared at 28°C, under 80% humidity and at a 12/12 h day/night cycle. Larvae were  
797 fed with cat food and adult mosquitoes were fed *ad libitum* with 10% sugar solution. For tissue  
798 microscopy, adult female mosquitoes were dissected in 1 X PBS, fixed in 4% paraformaldehyde  
799 (PFA), washed three times and mounted using Vectashield mounting medium containing DAPI.  
800 For hemolymph perfusion, 3-5-day-old female mosquitoes were anesthetized on ice for 10 min,  
801 microinjected with 700 nl of a buffer containing 60% Schneider's Medium, 10% fetal bovine serum  
802 (FBS), and 30% citrate buffer (anticoagulant; 98 mM NaOH, 186 mM NaCl, 1.7 mM EDTA, 41  
803 mM citric acid, pH 4.5) and allowed to rest, on ice, for 10 min. A small cut was made between the  
804 last two abdominal segments with the help of dissection scissors and the flow through was  
805 collected after further injection of 10 µl of buffer. For microscopy analyses, mosquitoes were  
806 perfused directly onto glass slides or coverslips, and cells were allowed to attach for at least 15  
807 min prior to fixation in 4% PFA. Cells were next stained with a 1:100 dilution of Alexa 488  
808 Phalloidin (ThermoFisher) for 30 min at room temperature. For the DiD analyses, cells were  
809 stained with DiD (5 µM) for 20 min prior to PFA fixation. Following washes, cells were mounted  
810 as described above, and analyzed on a Zeiss Axiovert microscope.

811

## 812 **FACS and single-cell RNA-sequencing by SMART-Seq2**

813 For FACS and imaging flow cytometry analyses, 10-12 mosquitoes were perfused. Hemolymph  
814 perfusate was collected with the help of a pipette, transferred into a siliconized microtube and  
815 diluted to a final volume of 500  $\mu$ l buffer containing 2  $\mu$ g/ml of Hoechst 3342 (Molecular Probes).  
816 Cells were immediately analyzed in a BD ARIA II Cell Sorter equipped with violet and green-  
817 yellow lasers at 405 and 561 nm, respectively. Cells were first gated based on their RFP  
818 fluorescence, followed by positive Hoechst signal, with Area versus Width measurements being  
819 used for doublet discrimination. The FACS machine was standardized with fluorochrome-  
820 containing beads and sorting purity was validated by visualization of cells sorted onto a glass  
821 coverslip. Cells were sorted into a 96-well PCR plate containing 5  $\mu$ l of 0.2% Triton X-100  
822 supplemented with 2 U/ $\mu$ l of RNase inhibitor (Clontech), with two wells containing 30 cells each  
823 (pool samples) and one column (8 wells) containing only the lysis buffer used as a negative  
824 control. We added ERCC spike-ins (Ambion) at a 1:2 billion dilution into the plate prior to cDNA  
825 synthesis and all samples were next processed according to the SMART-Seq2 protocol using up  
826 to 22 PCR cycles for cDNA synthesis (Picelli et al., 2013). PCR products were purified with  
827 AMPure XP beads (Beckman Coulter). Quality control was performed for each sample individually  
828 both as cDNA input and sequencing library using a high sensitivity DNA kit (Agilent). A total of  
829 125 pg of cDNA was used for library construction. cDNA libraries were pooled at a 10nM final  
830 concentration and 100 bp paired end sequencing was performed in one lane using a HiSeq2000  
831 Sequencer (Illumina).

832

## 833 **RNA-seq data analysis**

834 Reads generated by sequencing were demultiplexed using bcl2fastq (version 1.8.4) and mapped  
835 to *A. gambiae* genome (P4), ERCC92 (Ambion) and *dTomato* sequence (Vologhonsky et al., 2015)  
836 with the STAR aligner (version 2.4.2a) (Dobin et al., 2013). The genome index was generated  
837 with *A. gambiae* geneset file in gtf format (P4.4) and gene count tables were produced during the  
838 mapping (--quantMode Genecounts). They were next normalized with size factors calculated from  
839 the ERCCs using DESeq2 (Love et al., 2014). For the purpose of comparisons, a gene was  
840 considered expressed if at least one normalized read was identified in at least one sample. Genes



841 were annotated using Vectorbase (Lawson et al., 2007) and manual curation. For comparisons  
842 with previous studies (Baton et al., 2009; Pinto et al., 2009; Smith et al., 2016), gene IDs were  
843 converted using Vectorbase and BioMart. Intersection analyses were performed in R using the  
844 VennDiagram and upsetR packages. Technical noise estimation and identification of the highly  
845 variable genes were performed as reported before (Brennecke et al., 2013), using the 60-  
846 percentile as the mean cut-off to include more ERCC genes in the technical fit. Principal  
847 component analyses were done with the *prcomp* function and differential expression analyses  
848 were based on the DESeq2 package, using the ERCC size factors and PPO6<sup>low</sup> versus PPO6<sup>high</sup>  
849 as comparison. For GO analyzes, we used topGO (Alexa et al., 2006) and GO terms were  
850 obtained from the org.Ag.eg.db annotation package. Analyses were performed in R and scripts  
851 are available upon request. The sequencing results were deposited in the European Nucleotide  
852 Archive under the following accession number: PRJEB23372 and the processed expression data  
853 can be accessed at <http://data.teichlab.org> for single gene visualization.

854

### 855 **Imaging flow cytometry**

856 Ten to twelve sugar-fed *PPO6::RFP* female mosquitoes were perfused to a final volume of 20-40  
857  $\mu$ l and the diluted hemolymph samples were immediately analyzed in an Amnis ImageStreamX  
858 MKII (Merck). For *PPO6::RFP* analyses, wild type mosquitoes were used to set background  
859 fluorescence and cells were measured with a 40x objective. Comparisons between cell  
860 subpopulations were performed using the “Object” mask and based on a built-in function that uses  
861 Fisher’s discriminant ratio (Rd) to determine the best statistical separation (largest Rd) between  
862 identified populations. For the DiD analyses, cells were collected into FBS-free buffer containing  
863 1  $\mu$ M of DiD and analyzed at 60x to increase resolution. Single staining controls representing  
864 RFP, DiD and medium alone were used for calibration and manual compensation. Experiments  
865 were repeated at least twice. Cell gating was confirmed considering the obtained images and  
866 manually curated to exclude debris and doublets that could not be excluded by the gating alone.  
867 Vesicle detection was performed as reported before (Headland et al., 2014). Briefly, DiD positive  
868 events were interrogated based on their level of DiD fluorescence and size scatter intensity. DiD-  
869 labelled vesicles showed a low scatter along with low to mid DiD fluorescence, whereas cells  
870 displayed mid to high fluorescence and scatter measurements. Speed beads, used for the  
871 instrument calibration and focusing, were easily gated out as a discrete population displaying very  
872 high levels of side-scatter intensity. The RFP intensity was measured based on the median pixel

873 by means of histogram, and cellular debris and doublets were excluded according to their  
874 brightfield area and aspect ratio. The identified populations were compared using the “Feature  
875 Finder” function of the IDEAS software (MilliporeSigma). Statistical analyses were based on  
876 Mann-Whitney-Wilcoxon and graphs were done in R.

877

### 878 **RNA *in situ* hybridization using RNAscope**

879 RNA *in situ* studies were performed according to the RNAscope Multiplex Fluorescence analyses  
880 manual (Advanced Cell Diagnostics). Briefly, cells were perfused onto glass slides, allowed to  
881 attach and fixed in PFA as described above. If needed, slides were dehydrated and kept in 100%  
882 ethanol at -20°C until processing. Samples from *A. stephensi* were handled following the same  
883 procedure. Tissue samples were processed immediately after dissection in RNase-free PBS. All  
884 RNAscope probes were designed by Advanced Cell Diagnostics and are commercially available.  
885 Each probe was individually tested against a negative control prior and during each analysis.  
886 Images were acquired using a Leica SP8 confocal microscope equipped with 405, 488, 561 and  
887 647 nm lasers and prepared for submission using the basic features of the LAS X software.

888

### 889 **Bead uptake assay**

890 For magnetic isolation of hemocytes, we followed the protocol by Smith et al 2016 with small  
891 modifications. Briefly, 20 female mosquitoes were cold anesthetized and injected with 300 µl of a  
892 2 mg/ml suspension of MagnaBind Carboxyl Derivatized Beads (Thermo Scientific). Mosquitoes  
893 were next kept at 28°C or 4°C for 2 h and perfused as described above. Hemolymph perfused  
894 was collected with the help of a pipette tip and transferred into a 0.5 µl Eppendorf tube containing  
895 100 µl of injection buffer. Samples were diluted to 200 µl and incubated in a magnetic stand for  
896 20 min at 4°C. Supernatant was removed by pipetting, magnetic pellet was resuspended in 1 X  
897 RNase-free PBS and transferred to a microscopy slide. Cells were allowed to attach for 15 min  
898 and processed for RNA-FISH as described above.

899

### 900 **Transwell assay**

901 For this assay, we used *PPO6::RFP* transgenic mosquitoes and the *A. gambiae* Ngousso  
902 (TEP1\*S1) wild-type mosquito strain. Perfusion was performed in the absence of FBS and  
903 hemolymph was collected with the help of a pipette onto the top of a glass coverslip placed inside  
904 a 24-well plate. A total of 100  $\mu$ l of buffer was further gently pipetted onto the cell drop to prevent  
905 dehydration. Cell inserts (Merck) were then placed over individual wells and hemolymph perfusate  
906 from *PPO6::RFP* female mosquitoes was gently pipetted onto the 1  $\mu$ m membrane mesh. Diluted  
907 hemolymph from at least 2 wild type and 4 transgenic mosquitoes were used per treatment, and  
908 the negative control consisted of overlaying coverslips with buffer only. Plates were kept at room  
909 temperature for at least 1 h; following by fixation of coverslips with 4% PFA and PBS washes prior  
910 to immediate processing based on the RNAscope manual. Images were obtained by confocal  
911 microscopy as described above. Experiments were repeated at least twice.

912

### 913 **Scanning electron microscopy:**

914 For scanning electron microscopy (SEM), cells were perfused from at least 2 female mosquitoes  
915 directly onto glass coverslips and fixed with 4% PFA. To facilitate exosome imaging, poly-L-lysine  
916 treated coverslips were used. For correlative SEM, cells were placed onto microscopic dishes  
917 with finder grids (ibidi) and imaged directly after 4% PFA fixation using a Zeiss Axiovert  
918 microscope, prior to SEM processing. The samples were post-fixed in 2.5% glutaraldehyde, 0.5%  
919 osmium-tetroxide, tannic acid and osmium-tetroxide again. The coverslips or optical membranes  
920 were then dehydrated in a graded ethanol series, dried in carbon dioxide at critical point and  
921 vacuum coated with 3 nm Carbon-Platinum. Imaging was performed using a LEO 1550 (Zeiss,  
922 Oberkochen DE) scanning-electron microscope. Experiments were repeated at least twice.

923

### 924 **Transmission electron microscopy:**

925 EVs were isolated according to a protocol described before (Kowal et al., 2016). In summary,  
926 hemolymph perfusate from at least 20 mosquitoes was subjected to differential centrifugation at  
927 4°C and the 10,000 x g pellet was processed for negative staining electron microscopy. Aliquots  
928 of the samples were applied to freshly glow discharged carbon- and pioloform-film-coated copper  
929 grids and allowed to adsorb for 10 min. After washes with distilled water, the grids were contrasted  
930 with 2% uranyl acetate, touched on filter paper and air-dried. The grids were examined in a LEO

931 906 (Zeiss AG, Oberkochen) electron microscope operated at 100 kV and images were recorded  
932 with a Morada (SIS-Olympus, Münster) digital camera.
